# Supplementary material for: The ratio of patient body mass index to age: a cost-effective implant selection guideline for total knee arthroplasty
Source: PubMed Central journal article supplement — Arthroplast Today. 2017 Oct 21;4(1):94–8. doi: 10.1016/j.artd.2017.08.001 (PMC5859741; doi:10.1016/j.artd.2017.08.001), 2017-10-21
Supplement: mmc4.pdf [file mmc4.pdf]

# CONFLICT OF INTEREST STATEMENT

## *Arthroplasty Today*

(Adopted from the American Academy of Orthopaedic Surgeons disclosure statement)

The following form **must be filled out completely and submitted by each author (example, 6 authors, 6 forms). If no discloser is required, please write/type "none" at the end of each sentence.**

---

Manuscript Title: Body Mass Index to Age Ratio: A Cost Effective Implant Selection Guideline for Total Knee Arthroplasty

1. Royalties from a company or supplier (The following conflicts were disclosed)  
none
2. Speakers bureau/paid presentations for a company or supplier (The following conflicts were disclosed)  
Pacira
- 3A. Paid employee for a company or supplier (The following conflicts were disclosed)  
none
- 3B. Paid consultant for a company or supplier (The following conflicts were disclosed)  
DJO, Medtronic, Depuy/Synthes
- 3C. Unpaid consultants for a company or supplier (The following conflicts were disclosed)  
none
4. Stock or stock options in a company or supplier (The following conflicts were disclosed)  
Wellbe, ActiveCare MCS
5. Research support from a company or supplier as a Principal Investigator (The following conflicts were disclosed)  
Pacira, Ferring Orthosensor, Vericel, Orthofix
6. Other financial or material support from a company or supplier (The following conflicts were disclosed)  
none
7. Royalties, financial or material support from publishers (The following conflicts were disclosed)  
none
8. Medical/Orthopaedic publications editorial/governing board (The following conflicts were disclosed)  
JBJS, JBJS Reviews, CORR, JOA, JAAOS, Arthroplasty Today
9. Board member/committee appointments for a society (The following conflicts were disclosed)  
HS, KS, AAHKS

**Each author must sign AND print or type his/her name, date and submit a separate form**

In addition, one BLINDED Conflict of Interest form (no author names used) should be submitted per manuscript with all author disclosures.

Richard Iorio

*Richard Iorio*

8/17/16

Author Name (Print or Type)

Author Signature

Date
